# Supplementary material for: Exploration of Alcohol Consumption Behaviours and Health-Related Influencing Factors of Young Adults in the UK
Source: MDPI journal article supplement (doi:10.3390/ijerph17176282), 2020-08-28
Supplement: s1 [file s1]

**Supplemental Table 1. Statistical analysis of the levels of alcohol consumption between Caucasian and other ethnic groups by gender**

| Variable      | Males<br>( <i>n</i> = 627, 43.5%) |                  |                 | Females<br>( <i>n</i> = 813, 56.5%) |                  |                 |
|---------------|-----------------------------------|------------------|-----------------|-------------------------------------|------------------|-----------------|
|               | <i>n</i> (%)                      | OR (CI)          | <i>p</i> -value | <i>n</i> (%)                        | OR (CI)          | <i>p</i> -value |
| Caucasian*    | 328 (52.3)                        |                  |                 | 455 (5.60)                          |                  |                 |
| Asian         | 113 (18.0)                        | 0.22 (0.13-0.37) | 0.00            | 158 (19.4)                          | 0.12 (0.08-1.19) | 0.00            |
| Black African | 47 (7.5)                          | 0.12 (0.06-0.26) | 0.00            | 41 (5.0)                            | 0.11 (0.05-0.23) | 0.00            |
| Mixed         | 18 (2.9)                          | 0.08 (0.02-0.32) | 0.00            | 16 (2.0)                            | 0.45 (0.17-1.16) | 0.09            |
| Other         | 121 (19.3)                        | 0.22 (0.13-0.38) | 0.00            | 143 (17.6)                          | 0.33 (0.22-0.49) | 0.00            |

*p*-value assessing the overall effect of each sub-group within ethnicity by gender, as output by the statistical model on the multinomial outcome (“alcohol consumption”) which yielded adjusted OR. OR: Odds Ratio; CI: 95% confidence interval. \*OR and CI of all sub-groups were computed using Caucasian as the reference group.
